# Supplementary material for: Potential metabolism determinants and drug–drug interactions of a natural flavanone bavachinin
Source: Royal Society of Chemistry journal article supplement (doi:10.1039/d0ra06961b), 2020-01-01
Supplement: d0ra06961b1.pdf [file d0ra06961b1.pdf]

Potential metabolism determinants and drug-drug interactions of a natural flavanone  
bavachinin

Xinqiang Li,<sup>a</sup> Han Xing,<sup>b</sup> Zifei Qin,<sup>\*b</sup> Jing Yang,<sup>b</sup> Peile Wang,<sup>b</sup> Xiaojian Zhang,<sup>b</sup> Zhihong Yao<sup>\*cd</sup> and Xinsheng Yao<sup>cd</sup>

<sup>a</sup> *Department of Pathology, the First Affiliated Hospital of Zhengzhou University, Zhengzhou 450052, China.*

<sup>b</sup> *Department of Pharmacy, the First Affiliated Hospital of Zhengzhou University, Zhengzhou 450052, China. E-mail: qzf1989@163.com*

<sup>c</sup> *International Cooperative Laboratory of Traditional Chinese Medicine Modernization and Innovative Drug Development Ministry of P.R. China, Jinan University, Guangzhou 510632, China. yaozhihong\_jnu@163.com*

<sup>d</sup> *College of Pharmacy, Jinan University, Guangzhou 510632, China.*

*\*Correspondence to: Dr. Zifei Qin, Phone: +86 371 66913423, Fax: +86 371 66913425, E-mail: qzf1989@163.com; Prof. Dr. Zhihong Yao, Phone: +86 20 85221767, Fax: +86 20 85221559, E-mail: yaozhihong\_jnu@163.com*

## Table list

**Table S1** Detailed UHPLC/Q-TOF-MS data for bavachinin and its related metabolites.

## Figure caption

**Figure S1** Extracted ion chromatograms (EIC) of bavachinin and its metabolites. (a) EIC analysis of bavachinin; (a) EIC analysis for phase I metabolites of bavachinin (M1-M3); (c) EIC analysis for the glucuronide of bavachinin (G1).

**Figure S2** Kinetic profiles for phase I metabolism of bavachinin by HLM and HIM. (a) the formation of M1 by HLM; (b) the formation of M2 by HLM; (c) the formation of M3 by HLM; (d) the formation of M1 by HIM; (e) the formation of M2 by HIM; (f) the formation of M3 by HIM; In each panel, the insert figure showed the corresponding Eadie-Hofstee plot. All experiments were presented as mean  $\pm$  SD (n = 3).

**Figure S3** Kinetic profiles for bavachinin glucuronidation by HLM and HIM. (a) the formation of G1 by HLM; (b) the formation of G2 by HLM; In each panel, the insert figure showed the corresponding Eadie-Hofstee plot. All experiments were presented as mean  $\pm$  SD (n = 3).

**Figure S4** Comparisons of metabolic activity of bavachinin. (a) Phase I metabolism rates of bavachinin by expressed CYP enzymes at 5.0  $\mu$ M; (b) Glucuronidation rates of bavachinin by expressed UGT isozymes at 5.0  $\mu$ M. All experiments were performed in triplicate (n = 3).

**Figure S5** Kinetic profiles for the formation of M1 by CYP enzymes. (a) the formation of M1 by CYP1A1; (b) the formation of M1 by CYP1A2; (c) the formation of M1 by CYP1B1; (d) the formation of M1 by CYP2A6; (e) the formation of M1 by CYP2C8; (f) the formation of M1 by CYP2C19; (g) the formation of M1 by CYP2D6; (h) the formation of M1 by CYP3A4; (i) the formation of M1 by CYP3A5; All experiments were performed in triplicate.

**Figure S6** Kinetic profiles for the formation of M2 by CYP enzymes. (a) the formation of M2 by CYP1A1; (b) the formation of M2 by CYP1B1; (c) the formation of M2 by CYP3A4; (d) the formation of M2 by CYP3A5; All experiments were performed in triplicate.

**Figure S7** Kinetic profiles for the formation of M3 by CYP enzymes. (a) the formation of M3 by CYP1A1; (b) the formation of M3 by CYP1A2; (c) the formation of M3 by CYP2B6; (d) the formation of M3 by CYP2C19; (e) the formation of M1 by CYP3A5; All experiments were performed in triplicate.

**Figure S8** Kinetic profiles for the formation of G1 by UGT enzymes. (a) the formation of G1 by UGT1A1; (b) the formation of G1 by UGT1A3; (c) the formation of G1 by UGT1A8; (d) the formation of G1 by UGT2B7; All experiments were performed in triplicate.

**Figure S9** Kinetic profiles for the formation of M1-M3 by RLM and MLM. (a) the formation of M1 by RLM; (b) the formation of M2 by RLM; (c) the formation of M3 by RLM; (d) the formation of M1 by MLM; (e) the formation of M2 by MLM; (f) the formation of M3 by MLM; All experiments were performed in triplicate.

**Figure S10** Kinetic profiles for the formation of M1-M3 by DLM and MpLM. (a) the formation of M1 by DLM; (b) the formation of M2 by DLM; (c) the formation of M3 by DLM; (d) the formation of M1 by MpLM; (e) the formation of M2 by MpLM; (f) the formation of M3 by MpLM; All experiments were performed in triplicate.

**Figure S11** Kinetic profiles for the formation of G1 by animal liver microsomes. (a) the formation of G1 by RLM; (b) the formation of G1 by MLM; (c) the formation of G1 by DLM; (d) the formation of G1 by MpLM; All experiments were performed in triplicate.

**Figure S12** Concentration-dependent inhibition of bavachinin towards expressed CYP and UGT enzymes. (a) concentration-dependent plot towards CYP2B6-mediated bupropion-hydroxylation; (b) concentration-dependent plot towards CYP2C9-mediated tolbutamide-4-hydroxylation; (c) concentration-dependent plot towards CYP2C19-mediated mephenytoin-4-hydroxylation; (d) concentration-dependent plot against UGT1A1-mediated  $\beta$ -estradiol-3-*O*-glucuronidation; (e) concentration-dependent plot against UGT1A9-mediated propofol-*O*-glucuronidation; (f) concentration-dependent plot against UGT2B7-mediated zidovudine-*N*-glucuronidation. All experiments were performed in triplicate. Data were presented as mean  $\pm$  SD.

**Figure S13** The inhibition curves and IC<sub>50</sub> values of bavachinin against CYP2B6 (a),

CYP2C9 (b), CYP2C19 (c), UGT1A1 (d), UGT1A9 (e), UGT2B7 (f). The data were fit to log (bavachinin) and normalized response equations. Each data point represented the mean value  $\pm$  the S.D. of triplicate determinations.

**Table S1** Detailed UHPLC/Q-TOF-MS data for bavachinin and its related metabolites.

| NO. | Time (min) | [M+H] <sup>+</sup> ion | Formula                                         | (+) ESI-MS/MS                                          | Identification           |
|-----|------------|------------------------|-------------------------------------------------|--------------------------------------------------------|--------------------------|
| P0  | 6.71       | 339.161                | C <sub>21</sub> H <sub>22</sub> O <sub>4</sub>  | 283.096, 271.097, 219.103, 147.049                     | bavachinin               |
| M1  | 5.75       | 355.158                | C <sub>21</sub> H <sub>22</sub> O <sub>5</sub>  | 337.144, 235.107, 217.087, 147.045                     | mono-oxidated bavachinin |
| M2  | 6.09       | 355.153                | C <sub>21</sub> H <sub>22</sub> O <sub>5</sub>  | 283.096, 181.050, 163.040, 133.030                     | mono-oxidated bavachinin |
| M3  | 6.58       | 355.155                | C <sub>21</sub> H <sub>22</sub> O <sub>5</sub>  | 299.092, 287.088, 219.101, 163.038                     | isomerized bavachinin    |
| G1  | 6.13       | 515.195                | C <sub>27</sub> H <sub>30</sub> O <sub>10</sub> | 459.133, 339.161, 283.095, 271.095<br>219.107, 147.047 | bavachinin-glucuronide   |

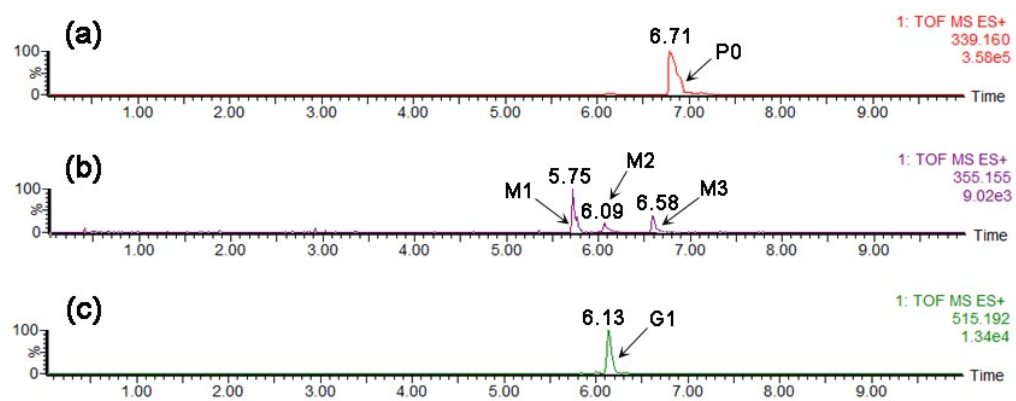

Figure

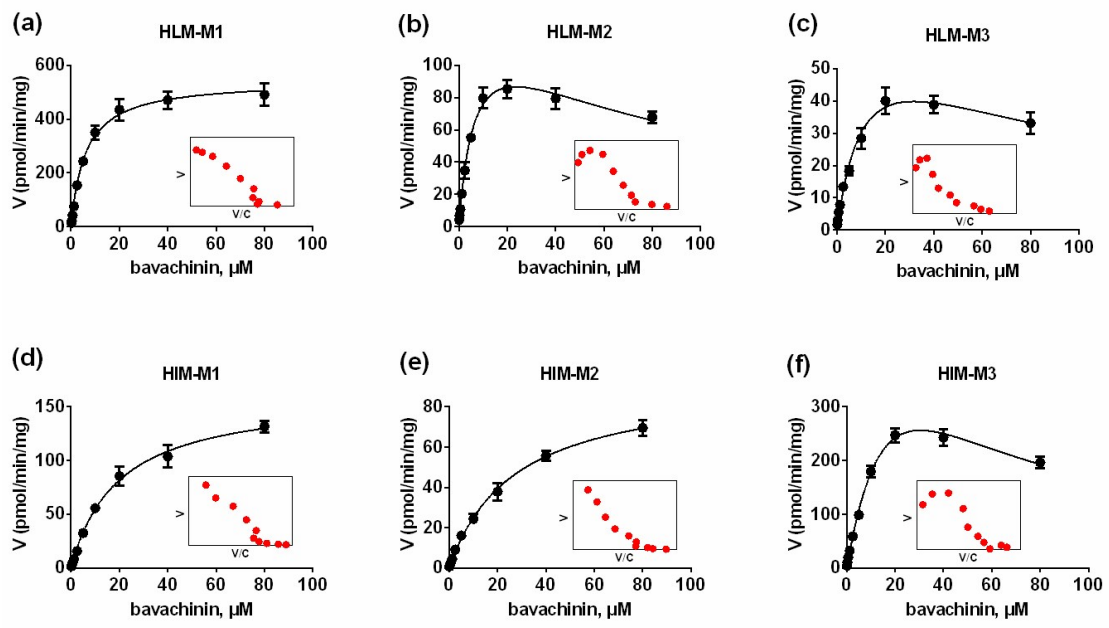

Figure S2

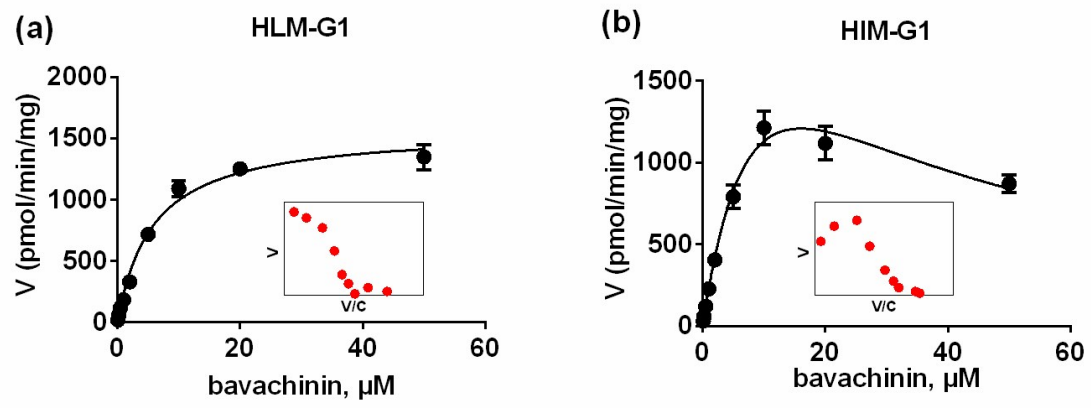

Figure S3



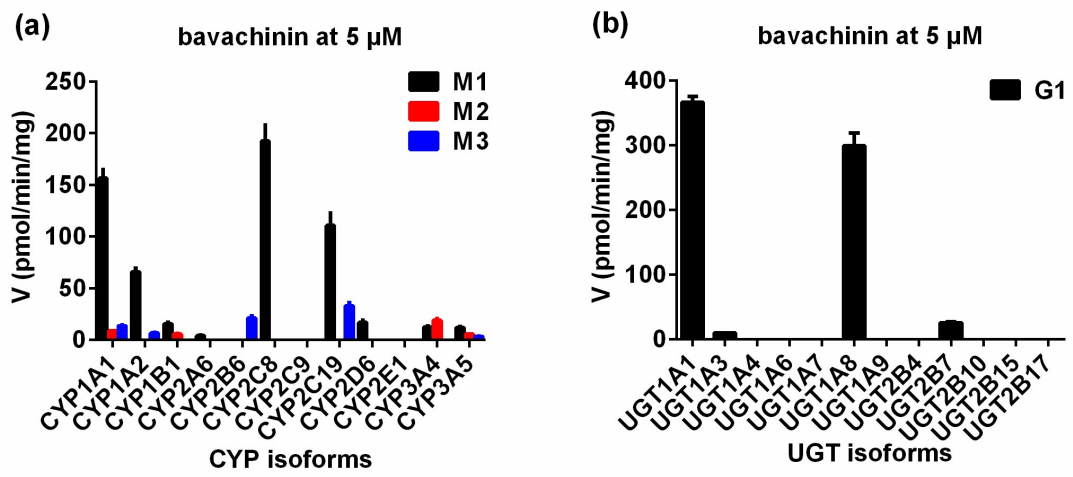

Figure S4

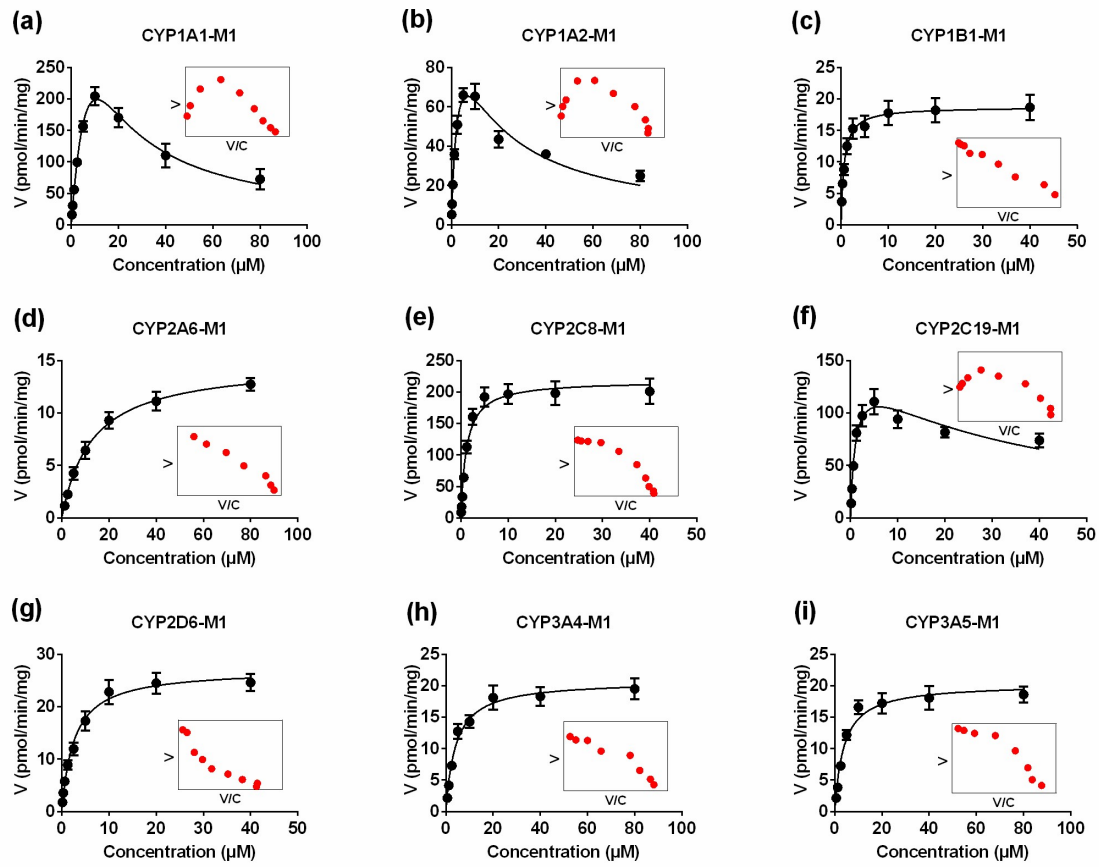

Figure S5

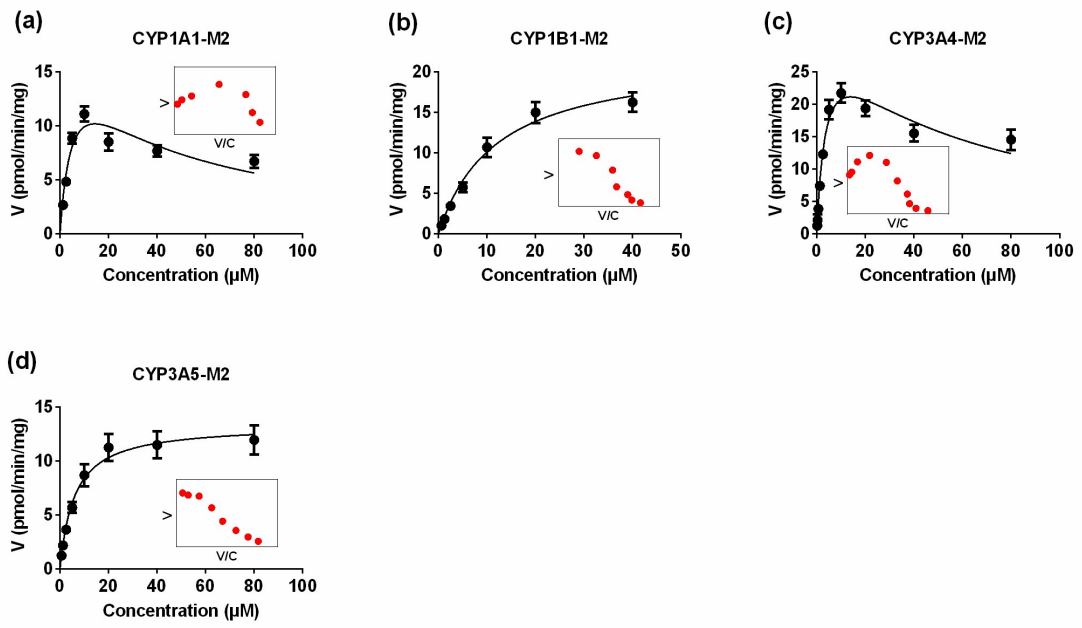

Figure S6

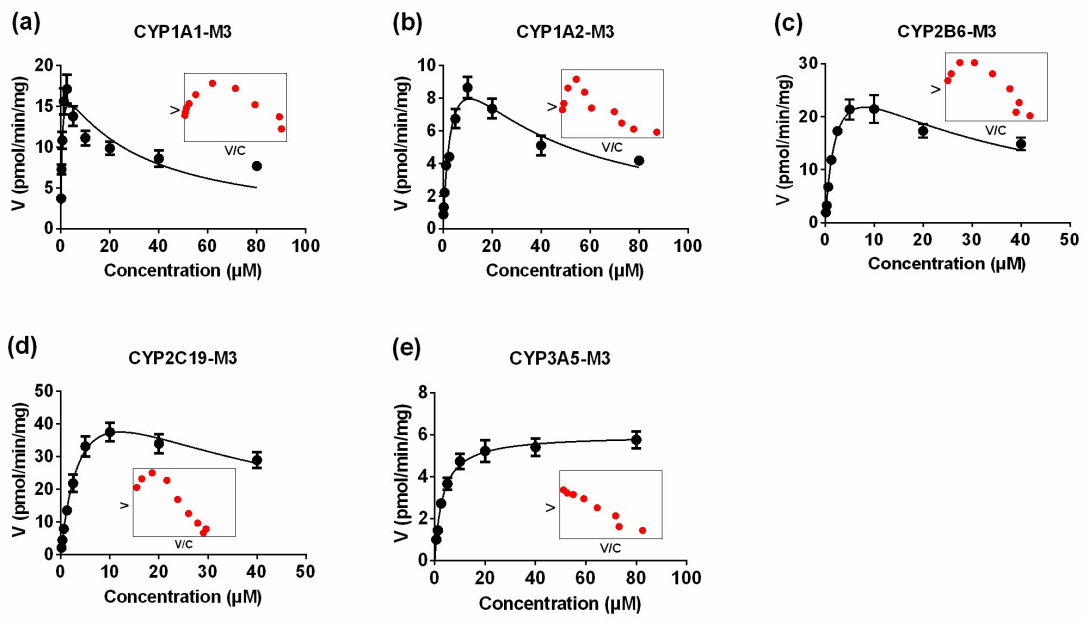

Figure S7

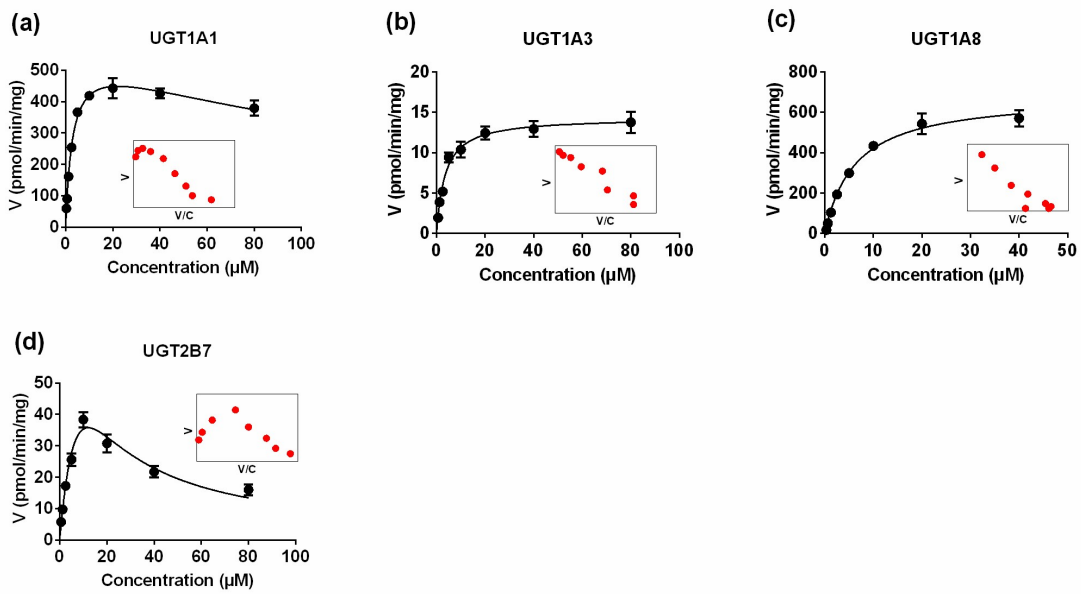

Figure S8

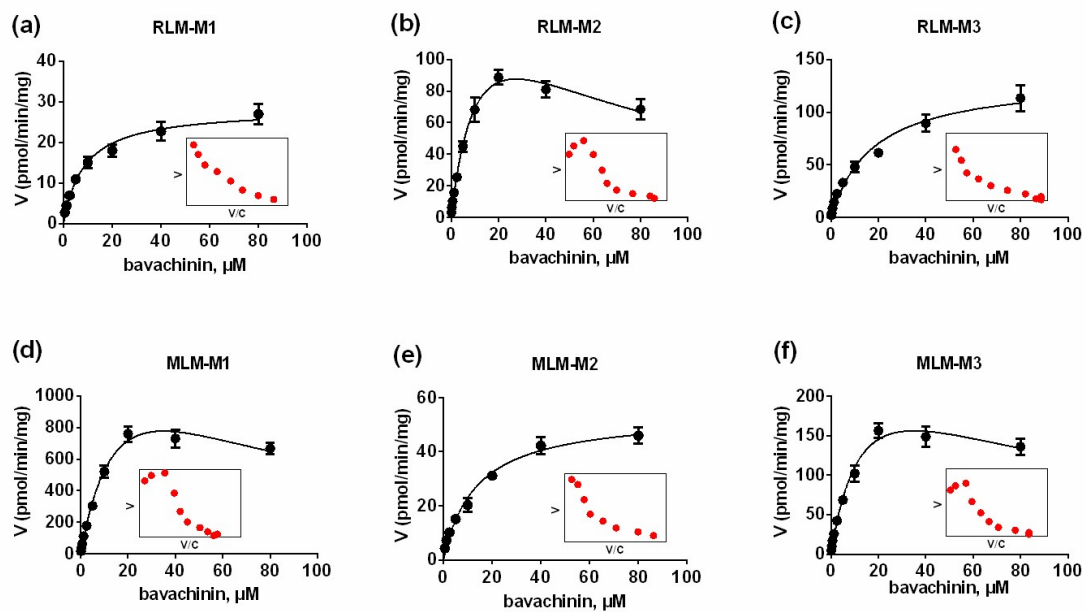

Figure S9

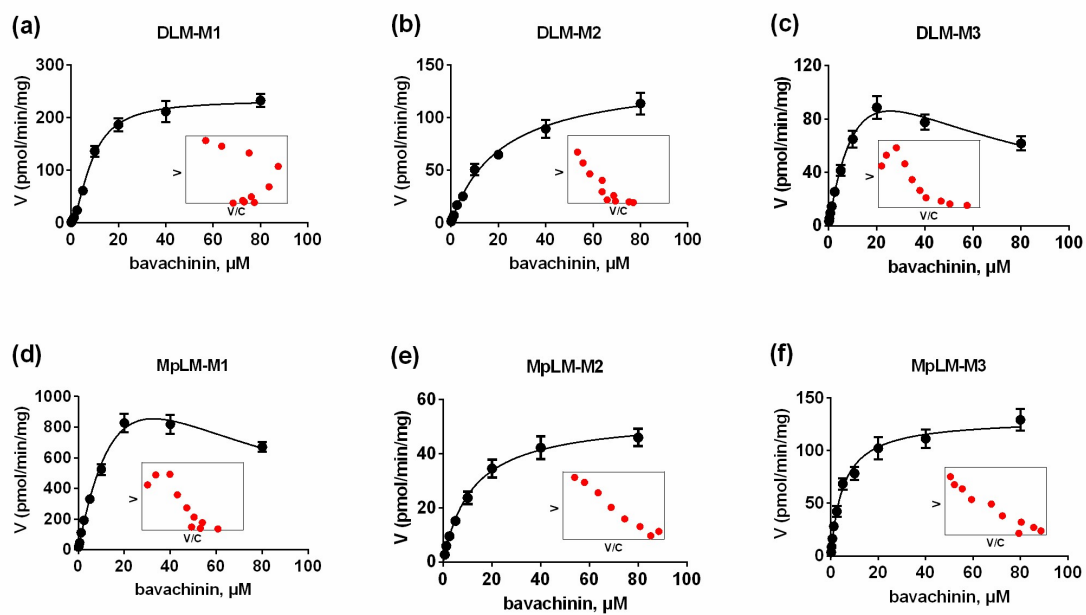

Figure S10

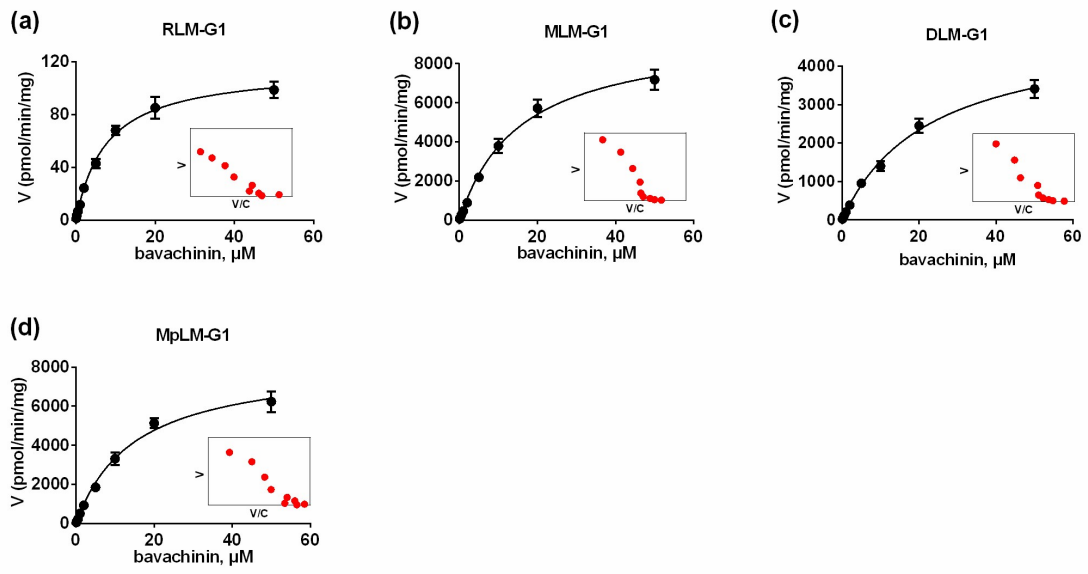

Figure S11



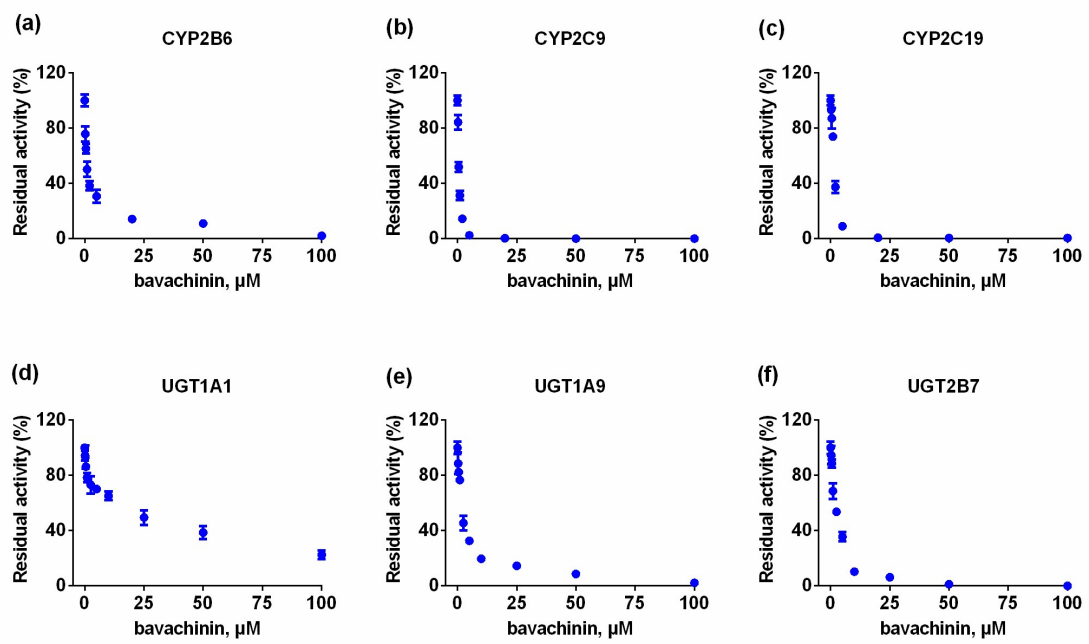

Figure S12

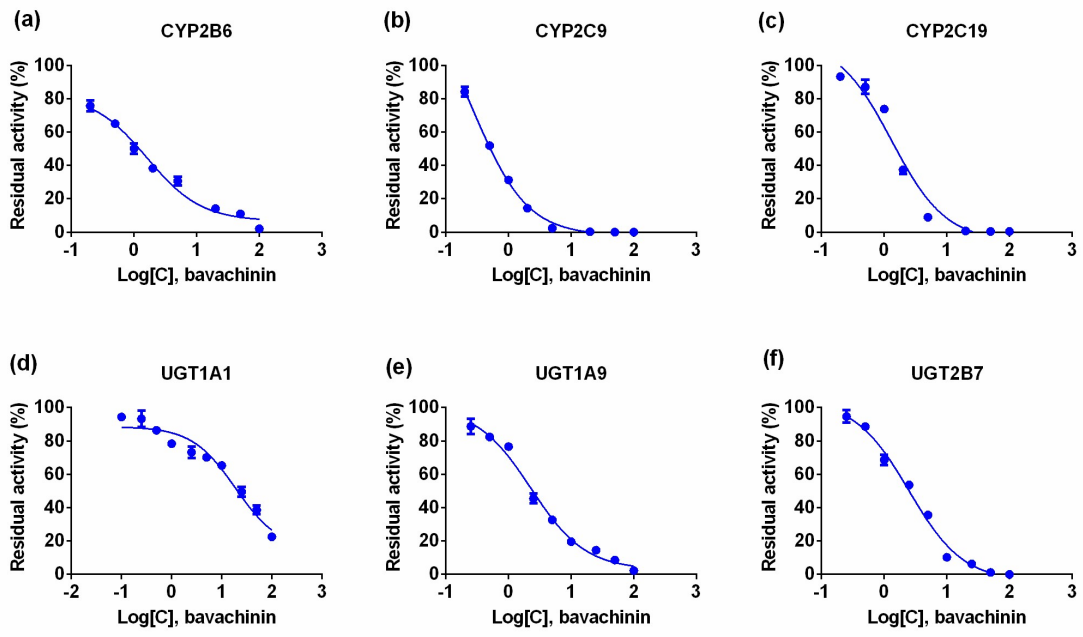

Figure S13
